# Supplementary material for: Eicosapentaenoic Acid Influences the Lipid Profile of an In Vitro Psoriatic Skin Model Produced with T Cells
Source: MDPI journal article supplement (doi:10.3390/biom13091413), 2023-09-19
Supplement: s1 [file s1]

## SUPPLEMENTARY MATERIAL

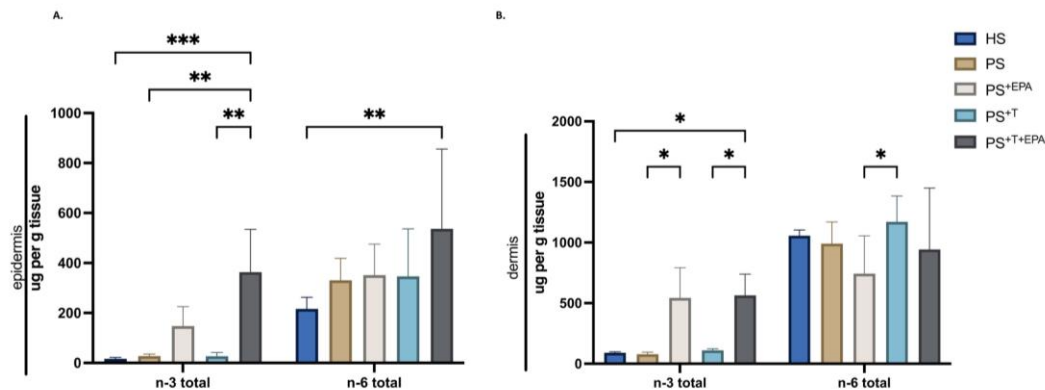

**Figure S1. Epidermal and dermal phospholipid quantification of the skin substitutes.** (A) Characterization of epidermal total fatty acids using gas chromatography. Impact of EPA supplementation on total n-3 and n-6 PUFAs quantities; (B) Characterization of dermal total fatty acids using gas chromatography. Impact of EPA supplementation on total n-3 and n-6 PUFAs quantities. The values are presented as  $\mu\text{g/g}$  of tissue; (N=3 donors, n=2 skin substitutes per donor). Statistical significance was determined using two-way ANOVA followed by Tukey's *post-hoc* test. Significant differences are indicated by asterisks (\* $p < 0.05$ ; \*\* $p < 0.01$ ; \*\*\* $p < 0.001$ ). Abbreviations: HS: healthy substitutes; EPA: eicosapentaenoic acid; PS: psoriatic substitutes; PS<sup>+EPA</sup>: psoriatic substitutes supplemented with EPA; PS<sup>+T</sup>: psoriatic substitutes produced with T cells; PS<sup>+T+EPA</sup>: psoriatic substitutes produced with T cells and supplemented with EPA; T: T cells.

The comparison of the levels of lipid mediators derived from n-3 and n-6 PUFAs between the PS and PS<sup>+T</sup> conditions was carried out. As for the n-3 PUFA lipid mediators, no difference between n-3 prostaglandins levels was noted between PS and PS<sup>+T</sup>. As for n-3 HFAs, the amounts of 12-HEPE were decreased in PS<sup>+T</sup> as compared with PS, suggesting that T cells might affect the efficiency of the 12-LOX enzyme (Figure S2.A). As for the n-6 PUFA lipid mediators, prostaglandin levels were relatively similar between PS and PS<sup>+T</sup>, except for PGE<sub>2</sub> where a significant increase was quantified in PS<sup>+T</sup>. Moreover, 12-HETE was diminished in PS<sup>+T</sup> compared with PS, reinforcing the hypothesis that the addition of T cells affects the function of 12-LOX preventing it from producing both 12-HEPE and 12-HETE (Figure S2.A and S2.B).

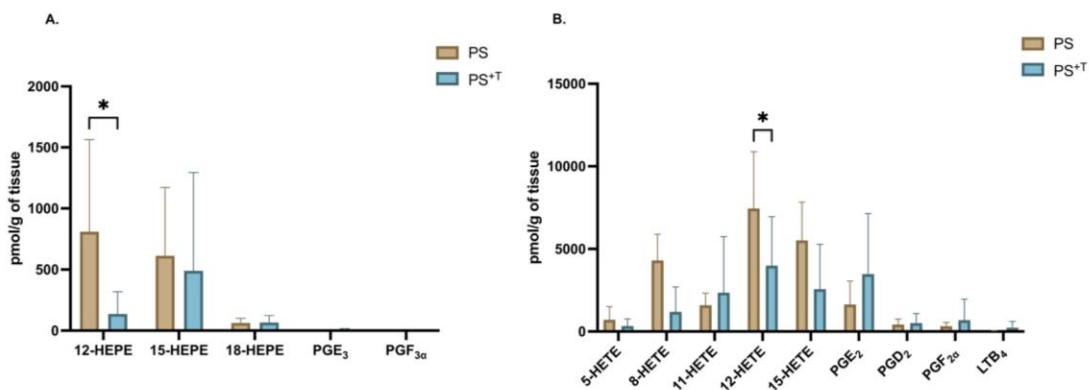

**Figure S2. n-3 and n-6-PUFA lipid mediator profile of the psoriatic skin conditions.** Influence of the addition of T cells to psoriatic substitutes the levels of n-3 and n-6-PUFA lipid derivatives in the epidermis of PS and PS<sup>+</sup>; (A) Characterization of epidermal n-3 lipid mediators derived from EPA; (B) Characterization of epidermal n-6 lipid mediators derived from AA. (N=3 donors; n=2 skin substitutes per donor). Statistical significance was determined using two-way

ANOVA followed by Bonferroni's *post-hoc* test. Significant differences are indicated by asterisks (\* $p < 0.05$ ). Abbreviations: AA: arachidonic acid; EPA: eicosapentaenoic acid; HEPE: hydroxyeicosapentaenoic acid; HETE: hydroxyeicosatetraenoic acid; T: T cells; n-3: omega-3; n-6: omega-6; PG: prostaglandin; PUFAs: polyunsaturated fatty acids; PS: psoriatic substitutes; PS<sup>T</sup>: psoriatic substitutes produced with T cells.

## Supplementary tables

**Table S1. Levels of fatty acids in phospholipids of the epidermis of the skin substitutes after EPA supplementation.**

| Epidermal phospholipids                    |                    |                    |                    |                   |                     |         |
|--------------------------------------------|--------------------|--------------------|--------------------|-------------------|---------------------|---------|
| Mean $\pm$ SD (%)                          |                    |                    |                    |                   |                     |         |
| Fatty acids                                | HS                 | PS                 | PS <sup>EPA</sup>  | PS <sup>T</sup>   | PS <sup>T+EPA</sup> | P-value |
| <b>Saturated FAs</b>                       |                    |                    |                    |                   |                     |         |
| 14:0 (Myristic acid)                       | 1.786 $\pm$ 0.374  | 2.185 $\pm$ 0.216  | 2.235 $\pm$ 0.154  | 2.048 $\pm$ 0.542 | 1.922 $\pm$ 0.401   | NS      |
| 16:0 (Palmitic acid)                       | 14.070 $\pm$ 1.043 | 14.458 $\pm$ 0.483 | 15.625 $\pm$ 0.741 | 16.29 $\pm$ 1.614 | 16.51 $\pm$ 1.77    | NS      |
| 18:0 (Stearic acid)                        | 11.365 $\pm$ 0.783 | 10.852 $\pm$ 0.501 | 11.228 $\pm$ 0.632 | 11.68 $\pm$ 0.978 | 13.618 $\pm$ 2.74   | NS      |
| 20:0                                       | 0.325 $\pm$ 0.187  | 0.307 $\pm$ 0.052  | 0.347 $\pm$ 0.06   | 0.405 $\pm$ 0.142 | 0.433 $\pm$ 0.107   | NS      |
| 22:0                                       | 0.667 $\pm$ 0.301  | 0.510 $\pm$ 0.082  | 0.345 $\pm$ 0.272  | 0.637 $\pm$ 0.221 | 0.773 $\pm$ 0.299   | NS      |
| 24:0                                       | 1.755 $\pm$ 0.591  | 1.378 $\pm$ 0.122  | 1.328 $\pm$ 0.101  | 1.678 $\pm$ 0.491 | 2.012 $\pm$ 0.646   | NS      |
| <b>n-3 PUFAs</b>                           |                    |                    |                    |                   |                     |         |
| t-18:3n-3                                  | ND                 | ND                 | ND                 | ND                | ND                  | NS      |
| 18:3n-3 (ALA)                              | ND                 | ND                 | ND                 | ND                | ND                  | NS      |
| 20:3n-3 (ETE)                              | ND                 | ND                 | ND                 | ND                | ND                  | NS      |
| 20:4n-3 (ETA)                              | ND                 | ND                 | ND                 | ND                | ND                  | NS      |
| 20:5n-3 (EPA)                              | ND                 | 0.185 $\pm$ 0.102  | 2.838 $\pm$ 1.201  | 0.082 $\pm$ 0.09  | 2.645 $\pm$ 0.601   | <0.0001 |
| 22:3n-3                                    | ND                 | ND                 | ND                 | ND                | ND                  | NS      |
| 22:5n-3 (DPA)                              | 0.438 $\pm$ 0.073  | 0.445 $\pm$ 0.069  | 2.942 $\pm$ 2.042  | 0.457 $\pm$ 0.165 | 4.045 $\pm$ 1.895   | NS      |
| 22:6n-3 (DHA)                              | 0.388 $\pm$ 0.054  | 0.437 $\pm$ 1.178  | 1.818 $\pm$ 62.5   | 0.402 $\pm$ 0.097 | 2.505 $\pm$ 1.294   | <0.0001 |
| <b>n-5 PUFAs</b>                           |                    |                    |                    |                   |                     |         |
| t-14:1n-5                                  | ND                 | ND                 | ND                 | ND                | ND                  | NS      |
| 14:1n-5                                    | ND                 | ND                 | ND                 | ND                | ND                  | NS      |
| 18:1n-5                                    | 0.472 $\pm$ 0.138  | 0.320 $\pm$ 0.0054 | 0.328 $\pm$ 0.067  | 0.437 $\pm$ 0.08  | 0.240 $\pm$ 0.196   | NS      |
| <b>n-6 PUFAs</b>                           |                    |                    |                    |                   |                     |         |
| 18:1                                       | ND                 | ND                 | ND                 | ND                | ND                  | NS      |
| t-18:2n-6                                  | 0.12 $\pm$ 0.134   | 0.357 $\pm$ 0.203  | 0.255 $\pm$ 0.141  | 0.160 $\pm$ 0.137 | 0.07 $\pm$ 0.109    | NS      |
| 9c12t-18:2n-6                              | 0.170 $\pm$ 0.137  | 0.365 $\pm$ 0.067  | 0.255 $\pm$ 0.051  | 0.257 $\pm$ 0.175 | 0.112 $\pm$ 0.131   | NS      |
| 8t12c-18:2n-6                              | 0.103 $\pm$ 0.161  | ND                 | 0.183 $\pm$ 0.299  | 0.302 $\pm$ 0.387 | 0.040 $\pm$ 0.098   | NS      |
| 18:2n-6 (LA)                               | 3.750 $\pm$ 0.296  | 5.408 $\pm$ 0.870  | 4.547 $\pm$ 0.866  | 4.332 $\pm$ 1.115 | 4.980 $\pm$ 0.188   | 0.0023  |
| 18:3n-6 ( $\gamma$ -linolenic acid)        | 0.048 $\pm$ 0.118  | 0.462 $\pm$ 0.276  | 0.252 $\pm$ 0.221  | 0.097 $\pm$ 0.150 | 0.065 $\pm$ 0.107   | NS      |
| 20:2n-6                                    | ND                 | 0.045 $\pm$ 0.071  | 0.037 $\pm$ 0.058  | 0.042 $\pm$ 0.066 | 0.043 $\pm$ 0.07    | NS      |
| 20:3n-6 (dihomo- $\gamma$ -linolenic acid) | 0.915 $\pm$ 0.256  | 1.255 $\pm$ 0.175  | 1.170 $\pm$ 0.132  | 1.360 $\pm$ 0.493 | 1.548 $\pm$ 0.434   | NS      |
| 20:4n-6 (AA)                               | 1.783 $\pm$ 1.412  | 3.962 $\pm$ 0.359  | 3.312 $\pm$ 0.461  | 4.030 $\pm$ 1.187 | 3.498 $\pm$ 0.460   | <0.0001 |
| 22:2n-6                                    | ND                 | ND                 | ND                 | ND                | ND                  | NS      |
| 22:4n-6                                    | 0.623 $\pm$ 0.564  | 1.020 $\pm$ 0.231  | 0.743 $\pm$ 0.107  | 1.118 $\pm$ 0.329 | 0.903 $\pm$ 0.399   | NS      |
| 22:5n-6                                    | 0.917 $\pm$ 0.123  | 0.195 $\pm$ 0.096  | 0.040 $\pm$ 0.062  | 0.178 $\pm$ 0.139 | 0.088 $\pm$ 0.110   | NS      |
| <b>n-7 MUFAs</b>                           |                    |                    |                    |                   |                     |         |
| t-16:1n-7                                  | ND                 | ND                 | ND                 | ND                | ND                  | NS      |
| 16:1n-7 (Palmitoleic acid)                 | 8.557 $\pm$ 1.733  | 10.452 $\pm$ 2.072 | 10.355 $\pm$ 1.884 | 8.813 $\pm$ 2.643 | 6.975 $\pm$ 3.303   | NS      |
| t-18:1n-7                                  | 0.025 $\pm$ 0.061  | 0.05 $\pm$ 0.078   | 0.037 $\pm$ 0.057  | 0.028 $\pm$ 0.069 | 0.037 $\pm$ 0.057   | NS      |
| 18:1n-7 (Vaccenic acid)                    | 15.847 $\pm$ 1.809 | 13.723 $\pm$ 0.954 | 12.83 $\pm$ 0.789  | 13.847 $\pm$ 1.00 | 10.2 $\pm$ 3.807    | 0.0101  |
| <b>n-9 MUFA</b>                            |                    |                    |                    |                   |                     |         |

|                      |                |                |                |                |                 |         |
|----------------------|----------------|----------------|----------------|----------------|-----------------|---------|
| t-18:1n-9            | 0.09 ± 0.143   | 0.067 ± 0.103  | 0.052 ± 0.08   | 0.075 ± 0.117  | 0.053 ± 0.084   | NS      |
| 18:1n-9 (Oleic acid) | 29.92 ± 1.901  | 27.723 ± 2.776 | 27.02 ± 2.105  | 28.482 ± 0.76  | 28.88 ± 2.946   | NS      |
| 20:1n-9              | 0.337 ± 0.263  | 0.408 ± 0.064  | 0.353 ± 0.072  | 0.445 ± 0.169  | 0.258 ± 0.203   | NS      |
| 22:1n-9              | ND             | ND             | ND             | ND             | ND              | NS      |
| 24:1n-9              | 1.053 ± 0.209  | 0.732 ± 0.107  | 0.745 ± 0.176  | 0.992 ± 0.293  | 0.983 ± 0.278   | NS      |
| <b>n-12 MUFA</b>     |                |                |                |                |                 |         |
| t-18:1n-12           | ND             | ND             | ND             | ND             | ND              | NS      |
| 18:1n-12             | ND             | ND             | ND             | ND             | ND              | NS      |
| 20:1n-12             | ND             | ND             | ND             | ND             | ND              | NS      |
| <b>Totals</b>        |                |                |                |                |                 |         |
| Total SFAs           | 31.323 ± 2.153 | 31.22 ± 0.638  | 32.295 ± 1.00  | 33.629 ± 1.129 | 35.937 ± 3.169  | 0.0003  |
| Total PUFAs          | 11.852 ± 1.165 | 14.172 ± 1.751 | 15.112 ± 2.142 | 12.812 ± 2.65  | 18.535 ± 7.272  | <0.0001 |
| Total MUFAs          | 58.565 ± 3.241 | 55.338 ± 2.147 | 53.178 ± 2.797 | 54.738 ± 2.096 | 46.697 ± 10.117 | <0.0001 |

**Abbreviations:** AA, arachidonic acid; ALA, α-linolenic acid; DHA, docosahexaenoic acid; EPA, eicosapentaenoic acid; FA, fatty acid; LA, linoleic acid; MUFA, monounsaturated fatty acid; PUFAs, polyunsaturated fatty acids; SFA, saturated fatty acid; SD, standard deviation.

**Table S2. Levels of fatty acids in phospholipids of the dermis of the skin substitutes after EPA supplementation.**

| Dermal phospholipids       |                |                |                |                 |                      |         |
|----------------------------|----------------|----------------|----------------|-----------------|----------------------|---------|
| Mean ±SD (%)               |                |                |                |                 |                      |         |
| Fatty acids                | HS             | PS             | PS+EPA         | PS <sup>T</sup> | PS <sup>T</sup> +EPA | P-value |
| <b>Saturated FAs</b>       |                |                |                |                 |                      |         |
| 14:0 (Myristic acid)       | 2.096 ± 0.161  | 2.145 ± 0.153  | 2.035 ± 0.179  | 2.078 ± 0.42    | 1.722 ± 0.398        | NS      |
| 16:0 (Palmitic acid)       | 14.522 ± 0.607 | 14.557 ± 0.457 | 14.425 ± 0.842 | 15.585 ± 1.744  | 14.098 ± 0.817       | NS      |
| 18:0 (Stearic acid)        | 16.632 ± 0.27  | 16.652 ± 0.298 | 17.785 ± 0.323 | 18.343 ± 1.253  | 20.047 ± 2.046       | 0.0012  |
| 20:0                       | 0.182 ± 0.013  | 0.227 ± 0.025  | 0.22 ± 0.033   | 0.170 ± 0.096   | 0.237 ± 0.05         | NS      |
| 22:0                       | 0.572 ± 0.047  | 0.69 ± 0.072   | 0.7 ± 0.091    | 0.63 ± 0.179    | 0.745 ± 0.152        | NS      |
| 24:0                       | 1.15 ± 0.069   | 1.325 ± 0.103  | 1.625 ± 0.266  | 1.192 ± 0.186   | 1.582 ± 0.387        | NS      |
| <b>n-3 PUFAs</b>           |                |                |                |                 |                      |         |
| t-18:3n-3                  | ND             | ND             | ND             | ND              | ND                   | NS      |
| 18:3n-3 (ALA)              | ND             | ND             | ND             | ND              | ND                   | NS      |
| 20:3n-3 (ETE)              | ND             | ND             | ND             | ND              | ND                   | NS      |
| 20:4n-3 (ETA)              | ND             | ND             | ND             | ND              | ND                   | NS      |
| 20:5n-3 (EPA)              | 0.050 ± 0.046  | 0.018 ± 0.045  | 3.588 ± 2.138  | 0.092 ± 0.156   | 4.077 ± 2.568        | <0.0001 |
| 22:3n-3                    | ND             | ND             | ND             | ND              | ND                   | NS      |
| 22:5n-3 (DPA)              | 1.54 ± 0.06    | 1.437 ± 0.236  | 7.02 ± 1.599   | 1.688 ± 0.189   | 6.798 ± 1.552        | <0.0001 |
| 22:6n-3 (DHA)              | 1.094 ± 0.109  | 1.158 ± 0.115  | 2.587 ± 1.012  | 1.284 ± 0.28    | 3.28 ± 1.323         | 0.0001  |
| <b>n-5 PUFAs</b>           |                |                |                |                 |                      |         |
| t-14:1n-5                  | ND             | ND             | ND             | ND              | ND                   | NS      |
| 14:1n-5                    | ND             | ND             | ND             | ND              | ND                   | NS      |
| 18:1n-5                    | 0.48 ± 0.051   | 0.357 ± 0.065  | 0.328 ± 0.079  | 0.347 ± 0.269   | 0.257 ± 0.158        | NS      |
| <b>n-6 PUFAs</b>           |                |                |                |                 |                      |         |
| 18:1                       | ND             | ND             | ND             | ND              | ND                   | NS      |
| t-18:2n-6                  | 0.054 ± 0.05   | ND             | ND             | 0.012 ± 0.029   | ND                   | NS      |
| 9c12t-18:2n-6              | 0.12 ± 0.019   | 0.092 ± 0.073  | 0.023 ± 0.057  | 0.045 ± 0.07    | 0.068 ± 0.075        | NS      |
| 8t12c-18:2n-6              | 0.088 ± 0.082  | 0.065 ± 0.102  | ND             | 0.022 ± 0.053   | ND                   | NS      |
| 18:2n-6 (LA)               | 2.554 ± 0.222  | 4.642 ± 0.604  | 4.583 ± 0.692  | 3.362 ± 0.186   | 4.642 ± 0.692        | 0.0096  |
| 18:3n-6 (γ-linolenic acid) | 0.136 ± 0.026  | 0.125 ± 0.101  | 0.058 ± 0.092  | 0.062 ± 0.068   | 0.078 ± 0.092        | NS      |
| 20:2n-6                    | 0.164 ± 0.032  | 0.238 ± 0.044  | 0.182 ± 0.1    | 0.183 ± 0.144   | 0.148 ± 0.132        | NS      |

|                                            |                    |                    |                    |                    |                    |         |
|--------------------------------------------|--------------------|--------------------|--------------------|--------------------|--------------------|---------|
| 20:3n-6 (dihomo- $\gamma$ -linolenic acid) | 0.414 $\pm$ 0.053  | 0.54 $\pm$ 0.061   | 0.592 $\pm$ 0.09   | 0.455 $\pm$ 0.036  | 0.663 $\pm$ 0.122  | NS      |
| 20:4n-6 (AA)                               | 14.152 $\pm$ 1.688 | 20.395 $\pm$ 0.523 | 14.813 $\pm$ 2.657 | 19.715 $\pm$ 1.163 | 14.162 $\pm$ 3.66  | <0.0001 |
| 22:2n-6                                    | ND                 | ND                 | ND                 | ND                 | ND                 | NS      |
| 22:4n-6                                    | 2.992 $\pm$ 1.256  | 5.53 $\pm$ 0.627   | 2.223 $\pm$ 0.994  | 5.55 $\pm$ 0.748   | 1.957 $\pm$ 1.212  | <0.0001 |
| 22:5n-6                                    | 0.952 $\pm$ 0.447  | 1.575 $\pm$ 0.283  | 0.363 $\pm$ 0.246  | 1.815 $\pm$ 0.361  | 0.272 $\pm$ 0.3    | NS      |
| <b>n-7 MUFAs</b>                           |                    |                    |                    |                    |                    |         |
| t-16:1n-7                                  | ND                 | ND                 | ND                 | ND                 | ND                 | NS      |
| 16:1n-7 (Palmitoleic acid)                 | 2.438 $\pm$ 0.326  | 2.707 $\pm$ 0.661  | 2.655 $\pm$ 0.923  | 1.968 $\pm$ 0.282  | 1.758 $\pm$ 0.485  | NS      |
| t-18:1n-7                                  | 0.112 $\pm$ 0.033  | 0.133 $\pm$ 0.066  | 0.087 $\pm$ 0.096  | 0.04 $\pm$ 0.063   | 0.097 $\pm$ 0.077  | NS      |
| 18:1n-7 (Vaccenic acid)                    | 7.516 $\pm$ 0.917  | 6.635 $\pm$ 0.627  | 5.485 $\pm$ 0.576  | 6.357 $\pm$ 0.856  | 4.54 $\pm$ 1.435   | 0.0006  |
| <b>n-9 MUFA</b>                            |                    |                    |                    |                    |                    |         |
| t-18:1n-9                                  | 0.196 $\pm$ 0.038  | 0.185 $\pm$ 0.023  | 0.062 $\pm$ 0.098  | 0.123 $\pm$ 0.096  | 0.087 $\pm$ 0.1    | NS      |
| 18:1n-9 (Oleic acid)                       | 17.702 $\pm$ 0.793 | 16.363 $\pm$ 0.557 | 16.08 $\pm$ 0.439  | 16.802 $\pm$ 0.793 | 16.825 $\pm$ 1.064 | 0.0462  |
| 20:1n-9                                    | 0.474 $\pm$ 0.072  | 0.363 $\pm$ 0.074  | 0.285 $\pm$ 0.084  | 0.317 $\pm$ 0.170  | 0.178 $\pm$ 0.169  | NS      |
| 22:1n-9                                    | ND                 | ND                 | ND                 | ND                 | ND                 | NS      |
| 24:1n-9                                    | 2.01 $\pm$ 0.071   | 1.858 $\pm$ 0.183  | 1.74 $\pm$ 0.351   | 1.748 $\pm$ 0.228  | 1.518 $\pm$ 0.37   | NS      |
| <b>n-12 MUFA</b>                           |                    |                    |                    |                    |                    |         |
| t-18:1n-12                                 | ND                 | ND                 | ND                 | ND                 | ND                 | NS      |
| 18:1n-12                                   | ND                 | ND                 | ND                 | ND                 | ND                 | NS      |
| 20:1n-12                                   | ND                 | ND                 | ND                 | ND                 | ND                 | NS      |
| <b>Totals</b>                              |                    |                    |                    |                    |                    |         |
| Total SFAs                                 | 36.38 $\pm$ 0.432  | 36.817 $\pm$ 0.542 | 37.862 $\pm$ 1.124 | 38.805 $\pm$ 2.295 | 39.345 $\pm$ 1.756 | 0.0003  |
| Total PUFAs                                | 33.822 $\pm$ 0.826 | 35.808 $\pm$ 0.883 | 36.273 $\pm$ 1.62  | 34.303 $\pm$ 2.065 | 36.153 $\pm$ 2.245 | 0.0004  |
| Total MUFAs                                | 32.424 $\pm$ 1.284 | 30.068 $\pm$ 1.129 | 27.725 $\pm$ 1.216 | 28.778 $\pm$ 1.498 | 26.018 $\pm$ 2.688 | <0.0001 |

**Abbreviations:** AA, arachidonic acid; ALA,  $\alpha$ -linolenic acid; DHA, docosahexaenoic acid; EPA, eicosapentaenoic acid; FA, fatty acid; LA, linoleic acid; MUFA, monounsaturated fatty acid; PUFAs, polyunsaturated fatty acids; SFA, saturated fatty acid; SD, standard deviation.

**Table S3. Levels of bioactive lipids in the skin substitutes after EPA supplementation.**

| Bioactive lipids                           | Mean $\pm$ SD (pmol/g of tissue) |                         |                       | P-value                  |          |
|--------------------------------------------|----------------------------------|-------------------------|-----------------------|--------------------------|----------|
|                                            | HS                               | PS                      | PS <sup>+EPA</sup>    | PS vs PS <sup>+EPA</sup> | PS vs HS |
| <b>EPA derivatives</b>                     |                                  |                         |                       |                          |          |
| PGE <sub>3</sub>                           | 0.853 $\pm$ 2.09                 | ND                      | 360.83 $\pm$ 442.99   | 0.0191                   | NS       |
| PGF <sub>3<math>\alpha</math></sub>        | 1.227 $\pm$ 3.005                | ND                      | ND                    | NS                       | NS       |
| 12-HEPE                                    | 210.65 $\pm$ 278.51              | 809.65 $\pm$ 754.32     | 3721.27 $\pm$ 3011.2  | 0.0038                   | NS       |
| 15-HEPE                                    | 363.66 $\pm$ 763.37              | 612.63 $\pm$ 560.14     | 2169.45 $\pm$ 2097.3  | NS                       | NS       |
| 18-HEPE                                    | 22.17 $\pm$ 10.35                | 62.38 $\pm$ 38.06       | 668.49 $\pm$ 326.43   | NS                       | NS       |
| LTB <sub>5</sub>                           | ND                               | ND                      | ND                    | NS                       | NS       |
| <b>DHA derivatives</b>                     |                                  |                         |                       |                          |          |
| 14-HDHA                                    | 887.45 $\pm$ 555.26              | 835.71 $\pm$ 736.33     | 1219.96 $\pm$ 969.95  | NS                       | NS       |
| 17-HDHA                                    | 1142.95 $\pm$ 1132.65            | 2475.9 $\pm$ 1809.7     | 10561.7 $\pm$ 9171.6  | 0.0008                   | NS       |
| RvD <sub>5</sub>                           | ND                               | 27.9 $\pm$ 36.4         | 1.22 $\pm$ 2.45       | NS                       | NS       |
| Maresin 2                                  | 2.43 $\pm$ 3.77                  | ND                      | ND                    | NS                       | NS       |
| <b>LA derivatives</b>                      |                                  |                         |                       |                          |          |
| 9-HODE                                     | 7347.5 $\pm$ 3457.5              | 25210.8 $\pm$ 11934.1   | 12532.7 $\pm$ 14265.4 | NS                       | NS       |
| 13-HODE                                    | 28383.5 $\pm$ 21301.3            | 148139.3 $\pm$ 141509.9 | 55890.9 $\pm$ 34010.8 | NS                       | 0.0175   |
| <b>DGLA derivatives</b>                    |                                  |                         |                       |                          |          |
| PGE <sub>1</sub>                           | 8.32 $\pm$ 20.37                 | 25.6 $\pm$ 51.3         | 80.1 $\pm$ 46.5       | NS                       | NS       |
| 6-keto PGF <sub>1<math>\alpha</math></sub> | 12.5 $\pm$ 15.9                  | 4.8 $\pm$ 5.6           | 5.4 $\pm$ 6.2         | NS                       | NS       |
| 15-HETrE                                   | 72.3 $\pm$ 57.04                 | 334.9 $\pm$ 179.2       | 113.8 $\pm$ 24.6      | <0.0001                  | <0.0001  |
| LTB <sub>3</sub>                           | ND                               | ND                      | ND                    | NS                       | NS       |

**AA derivatives**

|                               |                |                 |                 |         |         |
|-------------------------------|----------------|-----------------|-----------------|---------|---------|
| PGE <sub>2</sub>              | 134.37 ± 52.9  | 1638.1 ± 1408.4 | 488.3 ± 330.6   | NS      | NS      |
| PGD <sub>2</sub>              | 39.9 ± 66.1    | 422.5 ± 325.3   | 250.8 ± 427.1   | NS      | NS      |
| 1a1b-dihomo PGF <sub>2α</sub> | 4.1 ± 1.79     | 6.83 ± 2.7      | 2.0 ± 2.35      | NS      | NS      |
| PGF <sub>2α</sub>             | 11.9 ± 13.5    | 319.7 ± 219.6   | 599.3 ± 814     | NS      | NS      |
| 5-HETE                        | 630.9 ± 249.1  | 706.2 ± 805.4   | 302.9 ± 261.6   | NS      | NS      |
| 8-HETE                        | 1004.1 ± 559.8 | 4300.6 ± 1587.2 | 801.8 ± 528.1   | 0.0284  | 0.0286  |
| 11-HETE                       | 626.1 ± 209.9  | 1586.3 ± 733.9  | 702.7 ± 199.2   | NS      | NS      |
| 12-HETE                       | 899.4 ± 510.8  | 7446.8 ± 3428.6 | 1885.2 ± 945.4  | <0.0001 | <0.0001 |
| 15-HETE                       | 644.9 ± 485.2  | 5516.7 ± 2306.3 | 2173.8 ± 2167.3 | 0.0251  | 0.0002  |
| LTB <sub>4</sub>              | 17.57 ± 16.7   | 211.5 ± 381.9   | 194.4 ± 393.3   | NS      | NS      |

**Abbreviations:** AA, arachidonic acid; ALA, α-linolenic acid; DGLA, dihomo-gamma-linolenic acid; DHA, docosahexaenoic acid; EPA, eicosapentaenoic acid; HEPE, hydroxyeicosapentaenoic acid; HETE, hydroperoxyeicosatetraenoic acid; HETRe, hydroxyeicosatrienoic acid; HDHA, hydroxydocosahexaenoic acid; HODE, hydroxyoctadecadienoic acid; LA, linoleic acid; LT, Leukotriene; N.D., not detected; PG, prostaglandin; Rv, Resolvin; SD, standard deviation.

**Table S4. Levels of bioactive lipids in the skin substitutes produced with T cells after EPA supplementation.**

| Bioactive lipids              | Mean ±SD (pmol/g of tissue) |                       | P-value                                   |
|-------------------------------|-----------------------------|-----------------------|-------------------------------------------|
|                               | PS <sup>+</sup> T           | PS <sup>+</sup> T+EPA | PS <sup>+</sup> T vs PS <sup>+</sup> TEPA |
| <b>EPA derivatives</b>        |                             |                       |                                           |
| PGE <sub>3</sub>              | 6.67 ± 8.967                | 293.32 ± 405.06       | NS                                        |
| PGF <sub>3α</sub>             | ND                          | 22.82 ± 55.90         | NS                                        |
| 12-HEPE                       | 137.27 ± 181.53             | 1665.95 ± 2344.6      | NS                                        |
| 15-HEPE                       | 489.5 ± 803.55              | 1532.95 ± 2350.13     | NS                                        |
| 18-HEPE                       | 65.65 ± 58.58               | 538.77 ± 203.93       | NS                                        |
| LTB <sub>5</sub>              | ND                          | ND                    | NS                                        |
| <b>DHA derivatives</b>        |                             |                       |                                           |
| 14-HDHA                       | 151.72 ± 211.34             | 410.99 ± 549.47       | NS                                        |
| 17-HDHA                       | 2030.9 ± 2271.9             | 4284.2 ± 3994.6       | NS                                        |
| RvD <sub>5</sub>              | ND                          | ND                    | NS                                        |
| Maresin 2                     | ND                          | ND                    | NS                                        |
| <b>LA derivatives</b>         |                             |                       |                                           |
| 9-HODE                        | 13521.7 ± 16007.7           | 8134.3 ± 10863.7      | NS                                        |
| 13-HODE                       | 87296 ± 132641.6            | 44923.6 ± 45115.6     | NS                                        |
| <b>DGLA derivatives</b>       |                             |                       |                                           |
| PGE <sub>1</sub>              | 40.9 ± 58.4                 | 80.3 ± 81.7           | NS                                        |
| 6-keto PGF <sub>1α</sub>      | 32.05 ± 48.9                | 2.4 ± 4.9             | NS                                        |
| 15-HETRe                      | 138.8 ± 160.1               | 77.3 ± 45.8           | NS                                        |
| LTB <sub>3</sub>              | 6.9 ± 17.1                  | ND                    | NS                                        |
| <b>AA derivatives</b>         |                             |                       |                                           |
| PGE <sub>2</sub>              | 2813.3 ± 3500.4             | 911.2 ± 990.4         | 0.0085                                    |
| PGD <sub>2</sub>              | 507.9 ± 577.7               | 219.3 ± 490.4         | NS                                        |
| 1a1b-dihomo PGF <sub>2α</sub> | 6.67 ± 2.6                  | 0.79 ± 1.59           | NS                                        |
| PGF <sub>2α</sub>             | 677.2 ± 1274.9              | 396.7 ± 766.3         | NS                                        |
| 5-HETE                        | 327.1 ± 427.3               | 130.9 ± 153.4         | NS                                        |
| 8-HETE                        | 1188.5 ± 1510.2             | 1525.3 ± 3026.7       | NS                                        |
| 11-HETE                       | 2355.1 ± 3387.2             | 448.9 ± 364.1         | NS                                        |
| 12-HETE                       | 3986.5 ± 2955.5             | 411.9 ± 301.1         | 0.0232                                    |
| 15-HETE                       | 2567.8 ± 2701.5             | 1619.6 ± 2035.1       | NS                                        |
| LTB <sub>4</sub>              | 225.1 ± 373.5               | 113.3 ± 235.6         | NS                                        |

**Abbreviations:** AA, arachidonic acid; ALA, α-linolenic acid; DGLA, dihomo-gamma-linolenic acid; DHA, docosahexaenoic acid; EPA, eicosapentaenoic acid; HEPE, hydroxyeicosapentaenoic acid; HETE, hydroperoxyeicosatetraenoic acid; HETRe, hydroxyeicosatrienoic acid; HDHA, hydroxydocosahexaenoic acid; HODE, hydroxyoctadecadienoic acid; LA, linoleic acid; LT, Leukotriene; N.D., not detected; PG, prostaglandin; Rv, Resolvin; SD, standard deviation.
